# Supplementary material for: Physical Activity During Pregnancy and Preterm Birth Among Women With Gestational Diabetes
Source: PubMed Central journal article supplement (PMC11659911; doi:10.1001/jamanetworkopen.2024.51799), 2024-12-19

## Supplemental Online Content

Gou W, Xiao C, Liang X, et al. Physical activity during pregnancy and preterm birth among women with gestational diabetes. *JAMA Netw Open*. 2024;7(12):e2451799. doi:10.1001/jamanetworkopen.2024.51799

**eTable 1.** A list of activities with a MET value of 3

**eTable 2.** Reasons for medically indicated preterm births

**eTable 3.** Comparison of baseline characteristics between participants with higher and lower moderate-to-vigorous-intensity physical activity in our study

**eTable 4.** Comparison of baseline characteristics between participants included and those excluded in our study

**eTable 5.** Association of the fraction of moderate-to-vigorous intensity physical activity from the physical activity energy expenditure with preterm birth stratified by the median age of participants

**eTable 6.** Sensitivity analyses of associations between physical activity and preterm birth

**eTable 7.** Secondary analyses of associations between physical activity and preterm birth

**eTable 8.** Association of physical activity with preterm birth stratified by primiparity

**eFigure 1.** Flowchart of study sample selection

**eFigure 2.** Distribution of daily MVPA and its coefficient of variation among individuals with different active physical activity patterns

This supplemental material has been provided by the authors to give readers additional information about their work.

**eTable 1. A list of activities with a MET value of 3.**

---

**Walking**

Walking, 2.5 mph, firm, level surface

Walking, treadmill, 2.0 to 2.4 mph (3.2 to 3.9 km/h), 0% grade

**Home activity**

Vacuuming, general, moderate effort

Making bed, changing linens

Sweeping garage, sidewalk, or outside house

Implied walking, putting away household items, moderate effort

Walking and carrying small child, child weighing 15 lbs or more

Elder care, disabled adult, bathing, dressing, moving into and out of bed, only active periods

**Lawn and garden**

Walking, gathering gardening tools

Walking, applying fertilizer or seeding a lawn, push applicator

Implied walking/standing – picking up yard, light, picking flowers or vegetables

Walking, gathering gardening tools

**Conditioning exercises**

Body weight resistance exercises (e.g., squat, lunge, push-up, crunch), general

Yoga, Hot

**Dancing:** waltz, foxtrot, slow dancing, samba tango, rumba, 19th century dance, mambo, cha cha

---

**eTable 2. Reasons for medically indicated preterm births.**

| Patient ID | Conditions                                                                        |
|------------|-----------------------------------------------------------------------------------|
| 1          | In vitro fertilization baby, hypertension, abnormal fetal position, thrombophilia |
| 2          | Preeclampsia                                                                      |
| 3          | Preeclampsia                                                                      |
| 4          | Premature rupture of membranes, fetal distress                                    |
| 5          | Cholestasis                                                                       |
| 6          | Cord around the body and fetal arrhythmia                                         |
| 7          | Abnormal fetal position                                                           |
| 8          | Other maternal systemic diseases                                                  |
| 9          | Fetal distress, other maternal systemic diseases                                  |
| 10         | Fetal distress                                                                    |
| 11         | Cholestasis, in vitro fertilization baby                                          |
| 12         | Cholestasis                                                                       |
| 13         | Preeclampsia                                                                      |
| 14         | Cholestasis                                                                       |
| 15         | Other maternal systemic diseases, in vitro fertilization baby                     |
| 16         | Preeclampsia                                                                      |
| 17         | Abnormal fetal position, other maternal systemic diseases                         |
| 18         | Premature rupture of membranes, other maternal systemic diseases                  |
| 19         | Preeclampsia                                                                      |
| 20         | Other maternal systemic diseases                                                  |
| 21         | Preeclampsia                                                                      |

**eTable 3. Comparison of baseline characteristics between participants with higher and lower moderate-to-vigorous-intensity physical activity in our study.**

| Characteristic                                  | Patients, No (%)                      |                          |
|-------------------------------------------------|---------------------------------------|--------------------------|
|                                                 | MVPA < 78.6 min<br>/ day <sup>a</sup> | MVPA ≥ 78.6<br>min / day |
|                                                 | n=714                                 | n=713                    |
| Age, mean (SD), years                           | 31.23 (3.89)                          | 31.28 (3.80)             |
| Gestational week at baseline, mean (SD), weeks  | 25.98 (2.01)                          | 25.75 (1.74)             |
| Pre-pregnancy BMI, mean (SD), kg/m <sup>2</sup> | 22.26 (3.43)                          | 22.24 (3.70)             |
| Primiparity                                     | 458 (64.1%)                           | 453 (63.5%)              |
| Pregnant with preeclampsia                      | 22 (3.1%)                             | 14 (2.0%)                |
| Pregnant with medication treatment              | 6 (0.4%)                              | 9 (0.8%)                 |
| Pregnant with history of preterm birth          | 10 (1.4%)                             | 8 (1.1%)                 |
| Education                                       |                                       |                          |
| ≤ High school or vocational school              | 73 (10.2%)                            | 92 (12.9%)               |
| University or professional school               | 546 (76.5%)                           | 506 (71.0%)              |
| > University                                    | 95 (13.3%)                            | 115 (16.1%)              |
| Household income, ¥/year                        |                                       |                          |
| < 100,000                                       | 164 (23.0%)                           | 175 (24.5%)              |
| 100,000 – 200,000                               | 273 (38.2%)                           | 280 (39.3%)              |
| > 200,000                                       | 277 (38.8%)                           | 258 (36.2%)              |
| Current smoking                                 | 30 (4.2%)                             | 21 (2.9%)                |
| Current drinking                                | 22 (3.1%)                             | 21 (2.9%)                |
| After COVID recruitment                         |                                       |                          |
| No                                              | 97 (13.6%)                            | 127 (17.8%)              |
| Yes                                             | 617 (86.4%)                           | 586 (82.2%)              |

Abbreviations: MVPA, Moderate-to-Vigorous Intensity Physical Activity.

<sup>a</sup> 78.6 is the median value of MVPA.

**eTable 4. Comparison of baseline characteristics between participants included and those excluded in our study.**

| Characteristic                                  | Patients, No (%)    |                   |
|-------------------------------------------------|---------------------|-------------------|
|                                                 | Included<br>n=1,427 | Excluded<br>n=475 |
| Age, mean (SD), years                           | 31.3 (3.8)          | 30.82 (3.72)      |
| Gestational week at baseline, mean (SD), weeks  | 25.9 (1.89)         | 26.03 (1.96)      |
| Pre-pregnancy BMI, mean (SD), kg/m <sup>2</sup> | 22.3 (3.6)          | 21.92 (3.65)      |
| Primiparity                                     | 911 (63.8%)         | 331 (69.7%)       |
| Pregnant with preeclampsia                      | 36 (2.5%)           | 12 (2.5%)         |
| Pregnant with medication treatment              | 15 (1.1 %)          | 2 (0.42%)         |
| Pregnant with history of preterm birth          | 18 (1.3%)           | 0 (0)             |
| Education                                       |                     |                   |
| ≤ High school or vocational school              | 164 (11.5%)         | 58 (13.6%)        |
| University or professional school               | 1053 (73.8%)        | 318 (74.5%)       |
| > University                                    | 210 (14.7%)         | 51 (11.9%)        |
| Household income, ¥/year                        |                     |                   |
| < 100,000                                       | 339 (23.8%)         | 63 (19.7%)        |
| 100,000 – 200,000                               | 552 (38.7%)         | 122 (38.2%)       |
| > 200,000                                       | 536 (37.6%)         | 134 (42.0%)       |
| Current smoking                                 | 50 (3.5%)           | 28 (6.6%)         |
| Current drinking                                | 43 (3.0%)           | 10 (2.3%)         |
| After COVID recruitment                         |                     |                   |
| No                                              | 224 (15.7%)         | 101 (21.3%)       |
| Yes                                             | 1,203 (84.3%)       | 374 (78.7%)       |

**eTable 5. Association of the fraction of moderate-to-vigorous intensity physical activity from the physical activity energy expenditure with preterm birth stratified by the median age of participants.**

| Age             | No. of preterm cases / total No. | OR (95% CI)        | $P_{\text{interaction}}=0.047$ |
|-----------------|----------------------------------|--------------------|--------------------------------|
| <31 years       | 31 / 714                         | 0.78 (0.53 - 1.16) |                                |
| $\geq 31$ years | 49 / 713                         | 0.68 (0.50 - 0.91) |                                |

Logistic regression was used to estimate the odds ratios and 95% CI for preterm birth per standard deviation change in the fraction of moderate-to-vigorous intensity physical activity from the physical activity energy expenditure, adjusting for age, gestational week at baseline, pre-pregnancy BMI, household income, educational level, smoking, alcohol drinking and parity.

**eTable 6. Sensitivity analyses of associations between physical activity and preterm birth.**

| Model                                                                                                                                | No. of preterm cases / total No. | MVPA, min / day    | FMVPA, %            | PAEE, kJ kg <sup>-1</sup> day <sup>-1</sup> |
|--------------------------------------------------------------------------------------------------------------------------------------|----------------------------------|--------------------|---------------------|---------------------------------------------|
| OR, multivariable-adjusted <sup>a</sup>                                                                                              | 80 / 1427                        | 0.64 (0.42 - 0.98) | 0.69 (0.55 - 0.88)  | 0.86 (0.68 - 1.09)                          |
| OR, multivariable-adjusted, including wear time as additional covariate                                                              | 80 / 1427                        | 0.64 (0.42 - 0.98) | 0.69 (0.55 - 0.88)  | 0.86 (0.68 - 1.10)                          |
| OR, multivariable-adjusted, including recruited period as additional covariate                                                       | 80 / 1427                        | 0.65 (0.42 - 0.98) | 0.69 (0.55 - 0.88)  | 0.85 (0.67 - 1.08)                          |
| OR, multivariable-adjusted, excluding participants with accelerometer wear time less than 5 days                                     | 80 / 1403                        | 0.64 (0.41 - 0.98) | 0.70 (0.55 - 0.89)  | 0.87 (0.69 - 1.10)                          |
| OR, multivariable-adjusted, excluding participants who were advised by their doctors to undergo bed rest to maintain their pregnancy | 79 / 1411                        | 0.62 (0.40 - 0.95) | 0.70 (0.55 - 0.89)  | 0.87 (0.69 - 1.10)                          |
| OR, multivariable-adjusted, excluding the twins and other multiples pregnant participants                                            | 71 / 1411                        | 0.61 (0.39 - 0.95) | 0.77 (0.60 - 0.98)  | 0.96 (0.74 - 1.23)                          |
| OR, multivariable-adjusted, including history of preterm birth as additional covariate                                               | 80 / 1427                        | 0.65 (0.42 - 0.99) | 0.71 (0.56 - 0.89)  | 0.86 (0.68 - 1.09)                          |
| OR, including preeclampsia as additional covariate                                                                                   | 80 / 1427                        | 0.65 (0.43 - 0.99) | 0.71 (0.56 - 0.90)  | 0.87 (0.69 - 1.10)                          |
| OR, including medication for the treatment of GDM as additional covariate                                                            | 80 / 1427                        | 0.65 (0.43 - 0.99) | 0.70 (0.55 - 0.88)  | 0.86 (0.68 - 1.09)                          |
| OR, including occupation as additional covariate                                                                                     | 80 / 1427                        | 0.62 (0.41 - 0.96) | 0.70 (0.55 - 0.89)  | 0.88 (0.69 - 1.11)                          |
| Beta, gestational age at delivery as continuous outcome <sup>b</sup>                                                                 | 80 / 1427                        | 0.22 (0.09 - 0.36) | 0.17 (0.096 - 0.25) | 0.088 (0.0084 - 0.17)                       |

<sup>a</sup> Logistic regression was used to estimate the odds ratios and 95% CI for preterm birth for preterm birth per 30-minute increase in MVPA and per standard deviation change in FMVPA and PAEE. Covariates included in the multivariable-adjusted model were age, gestational week at baseline, pre-pregnancy BMI, PAEE (only for MVPA) household income, educational level, smoking, alcohol drinking and parity. PAEE: physical activity energy expenditure; MVPA: Moderate-to-Vigorous Intensity Physical Activity; FMVPA: fraction of PAEE from MVPA.

<sup>b</sup> Linear regression was used to estimate the beta and 95% CI for gestational age at delivery per 30-minute increase in MVPA and per standard deviation change in FMVPA and PAEE. The adjusted covariates were the same as those used in the logistic regression.

**eTable 7. Secondary analyses of associations between physical activity and preterm birth.**

|                                              | No. of preterm cases / total No. | MVPA, min / day        | FMVPA, %             | PAEE, kJ kg <sup>-1</sup> day <sup>-1</sup> |
|----------------------------------------------|----------------------------------|------------------------|----------------------|---------------------------------------------|
| Spontaneous preterm                          | 59 / 1406                        |                        |                      |                                             |
| OR, preterm birth as outcome                 |                                  | 0.60 (0.36 - 0.98)     | 0.73 (0.55 - 0.96)   | 0.87 (0.66 - 1.15)                          |
| Beta, gestational age at delivery as outcome |                                  | 0.21 (0.079 - 0.34)    | 0.15 (0.073 - 0.22)  | 0.076 (-0.0012 - 0.15)                      |
| Medically indicated preterm                  | 21 / 1367                        |                        |                      |                                             |
| OR, preterm birth as outcome                 |                                  | 0.78 (0.36 - 1.70)     | 0.61 (0.39 - 0.96)   | 0.81 (0.52 - 1.28)                          |
| Beta, gestational age at delivery as outcome |                                  | 0.099 (-0.0019 - 0.20) | 0.09 (0.03 - 0.15)   | 0.05 (-0.02 - 0.11)                         |
| Moderate to late preterm                     | 74 / 1421                        |                        |                      |                                             |
| OR, preterm birth as outcome                 |                                  | 0.71 (0.46 - 1.09)     | 0.74 (0.58 - 0.94)   | 0.88 (0.69 - 1.12)                          |
| Beta, gestational age at delivery as outcome |                                  | 0.17 (0.047 - 0.30)    | 0.14 (0.067 - 0.21)  | 0.073 (-0.00038 - 0.15)                     |
| Very preterm                                 | 6 / 1352                         |                        |                      |                                             |
| OR, preterm birth as outcome                 |                                  | 0.17 (0.029 - 0.98)    | 0.37 (0.16 - 0.87)   | 0.62 (0.27 - 1.44)                          |
| Beta, gestational age at delivery as outcome |                                  | 0.14 (0.029 - 0.25)    | 0.098 (0.036 - 0.16) | 0.054 (-0.01 - 0.12)                        |

Logistic regression was used to estimate the odds ratios and 95% CI for preterm birth per 30-minute increase in MVPA and per standard deviation change in FMVPA and PAEE. Linear regression was employed to estimate the beta coefficients and corresponding 95% CI for gestational week at delivery. Covariates included in the model were age, gestational week at baseline, pre-pregnancy BMI, PAEE (only for MVPA) household income, educational level, smoking, alcohol drinking and parity. PAEE: physical activity energy expenditure; MVPA: Moderate-to-Vigorous Intensity Physical Activity; FMVPA: fraction of PAEE from MVPA.



**eTable 8. Association of physical activity with preterm birth stratified by primiparity.**

| Primiparity                      | No. of preterm cases / total No. | MVPA, min / day     | FMVPA, %            | PAEE, kJ kg <sup>-1</sup> day <sup>-1</sup> |
|----------------------------------|----------------------------------|---------------------|---------------------|---------------------------------------------|
| Yes                              |                                  |                     |                     |                                             |
| OR, preterm birth as outcome     | 54 / 911                         | 0.68 (0.40 - 1.17)  | 0.67 (0.51 - 0.89)  | 0.78 (0.58 - 1.04)                          |
| Beta, gestational age as outcome | 54 / 911                         | 0.22 (0.039 - 0.40) | 0.19 (0.1 - 0.29)   | 0.13 (0.02 - 0.23)                          |
| No                               |                                  |                     |                     |                                             |
| OR, preterm birth as outcome     | 26 / 516                         | 0.53 (0.26 - 1.07)  | 0.75 (0.50 - 1.14)  | 0.97 (0.66 - 1.44)                          |
| Beta, gestational age as outcome | 26 / 516                         | 0.27 (0.066 - 0.46) | 0.14 (0.015 - 0.26) | 0.019 (-0.1 - 0.14)                         |

Logistic regression was used to estimate the odds ratios and 95% CI for preterm birth per 30-minute increase in MVPA and per standard deviation change in FMVPA and PAEE. Linear regression was employed to estimate the beta coefficients and corresponding 95% CI for gestational week at delivery. Covariates included in the model were age, gestational week at baseline, pre-pregnancy BMI, PAEE (only for MVPA) household income, educational level, smoking, alcohol drinking and parity. PAEE: physical activity energy expenditure; MVPA: Moderate-to-Vigorous Intensity Physical Activity; FMVPA: fraction of PAEE from MVPA.

**Figure 1. Flowchart of study sample selection.** Abbreviations: WeBirth, Westlake Precision Birth Cohort.

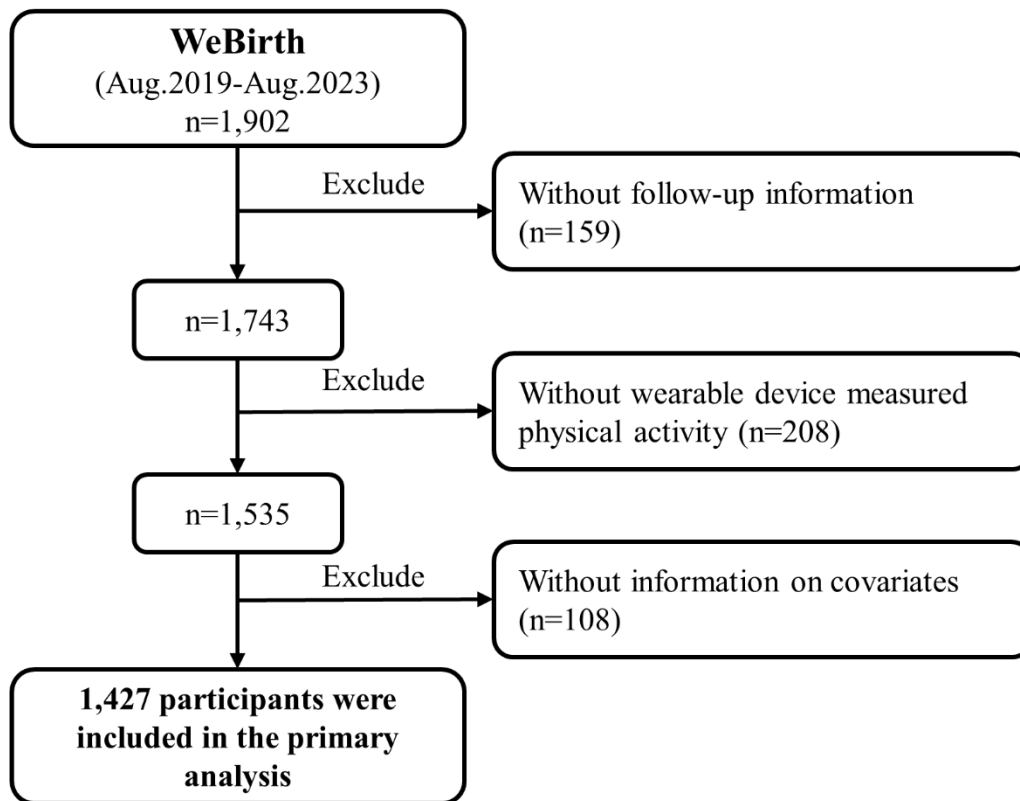

**eFigure 2. Distribution of daily MVPA and its coefficient of variation among individuals with different active physical activity patterns.** Abbreviations: MVPA, moderate-to-vigorous-intensity physical activity.

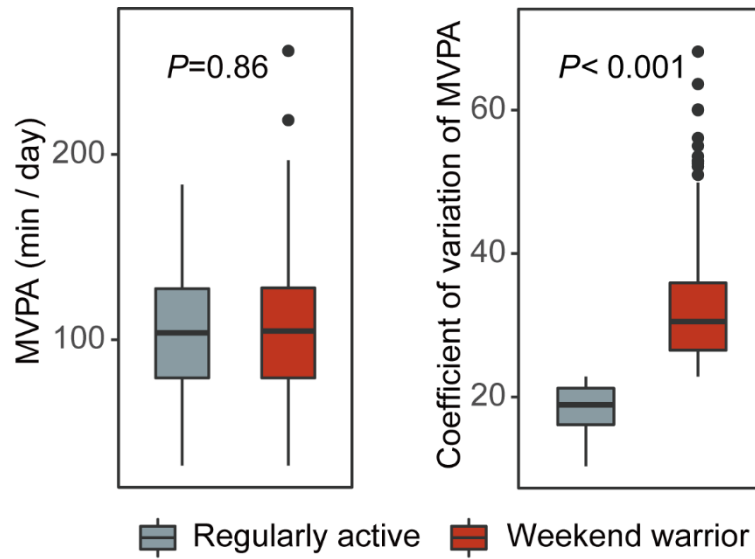

Supplement: jamanetwopen-e2451799-s001.pdf [file jamanetwopen-e2451799-s001.pdf]
