# Supplementary material for: Physical Activity During Pregnancy and Preterm Birth Among Women With Gestational Diabetes
Source: PubMed Central journal article supplement (PMC11659911; doi:10.1001/jamanetworkopen.2024.51799), 2024-12-19
Supplement: jamanetwopen-e2451799-s002.pdf [file jamanetwopen-e2451799-s002.pdf]

## Data Sharing Statement

Gou. Physical Activity During Pregnancy and Preterm Birth Among Women With Gestational Diabetes. *JAMA Netw Open*. Published December 19, 2024.

doi:10.1001/jamanetworkopen.2024.51799

### Data

**Data available:** No

### Additional Information

**Explanation for why data not available:** Data will be available upon request to the corresponding author.
